# Supplementary material for: Linkage and association mapping reveals the genetic basis of brown fibre (Gossypium hirsutum)
Source: PubMed Central journal article supplement (PMC6097129; doi:10.1111/pbi.12902), 2018-03-24
Supplement: PBI-16-1654-s001.pdf [file PBI-16-1654-s001.pdf]

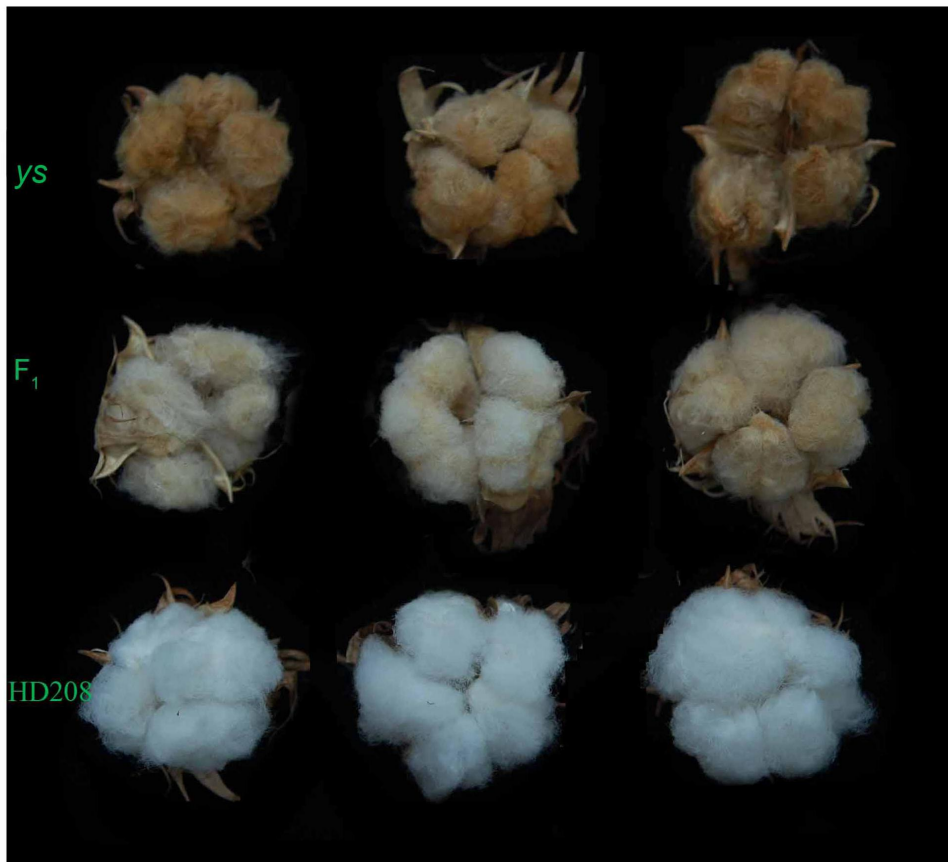

**Figure S1.** Bolls of the *ys* mutant, F<sub>1</sub> and HD208.

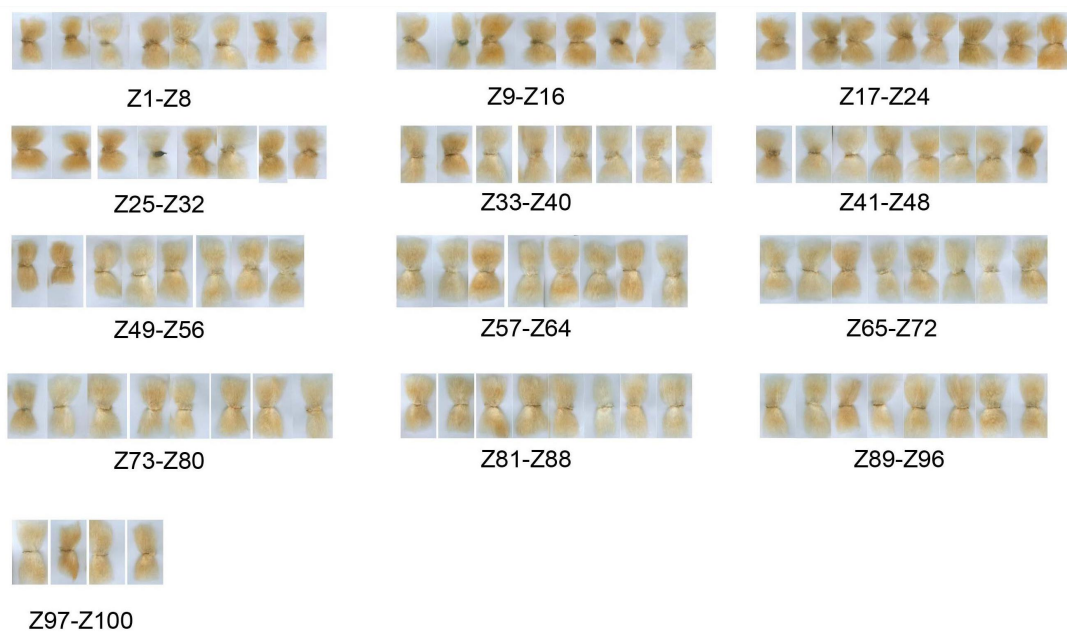

**Figure S2.** Fibre colour of 100 brown fibre accessions.



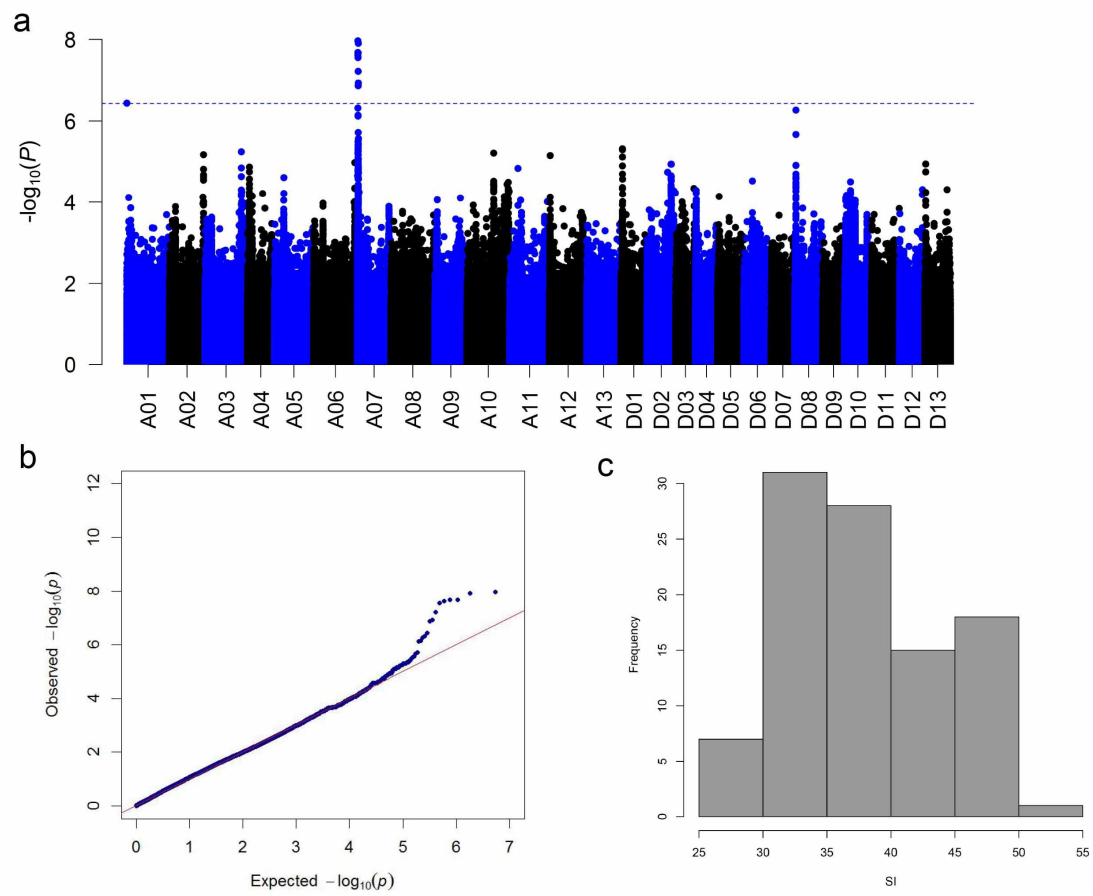

**Figure S4.** GWAS of the shade index (SI) in the BLUP data using the MLM (P+Q+K). (a) Manhattan plot of GWAS of SI. (b) Q-Q plot for SI. (c) Histogram of SI in the BLUP data.

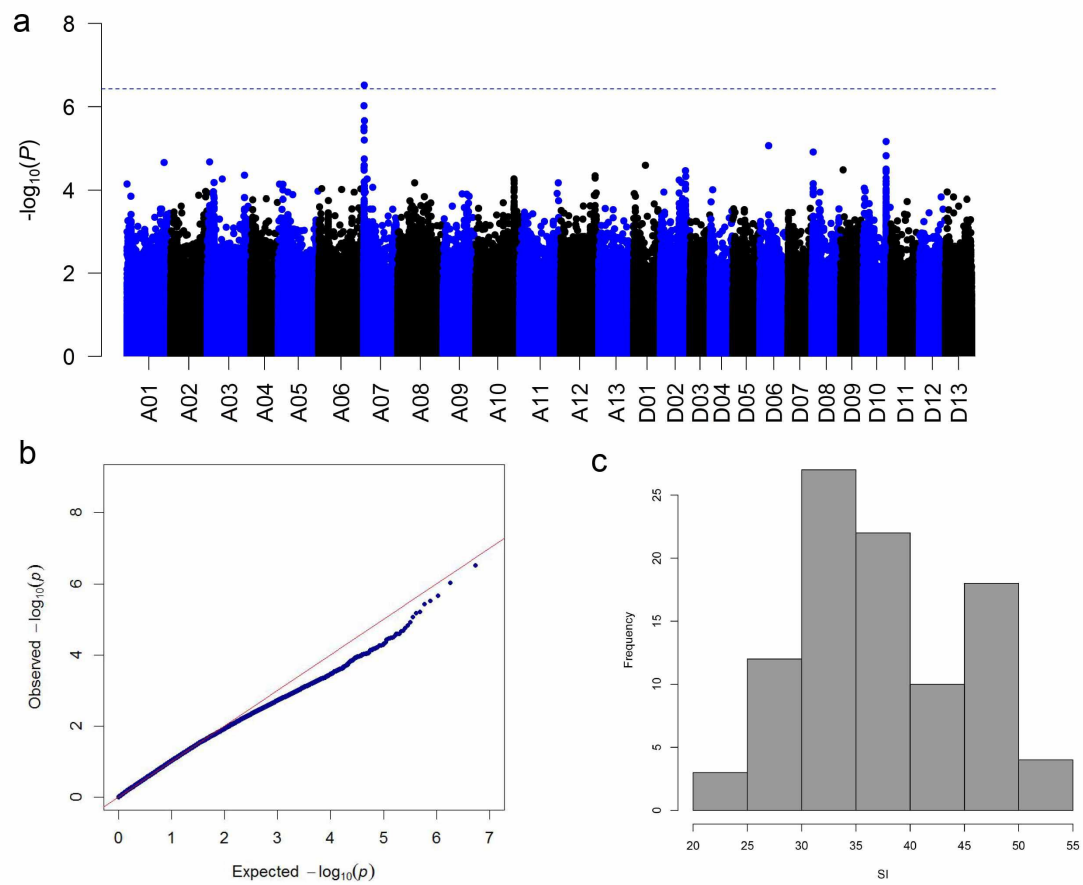

**Figure S5.** GWAS of the shade index (SI) in the HG15 environment using the MLM (P+Q+K). (a) Manhattan plot of GWAS of SI. (b) Q-Q plot for SI. (c) Histogram of SI in the HG15 environment.

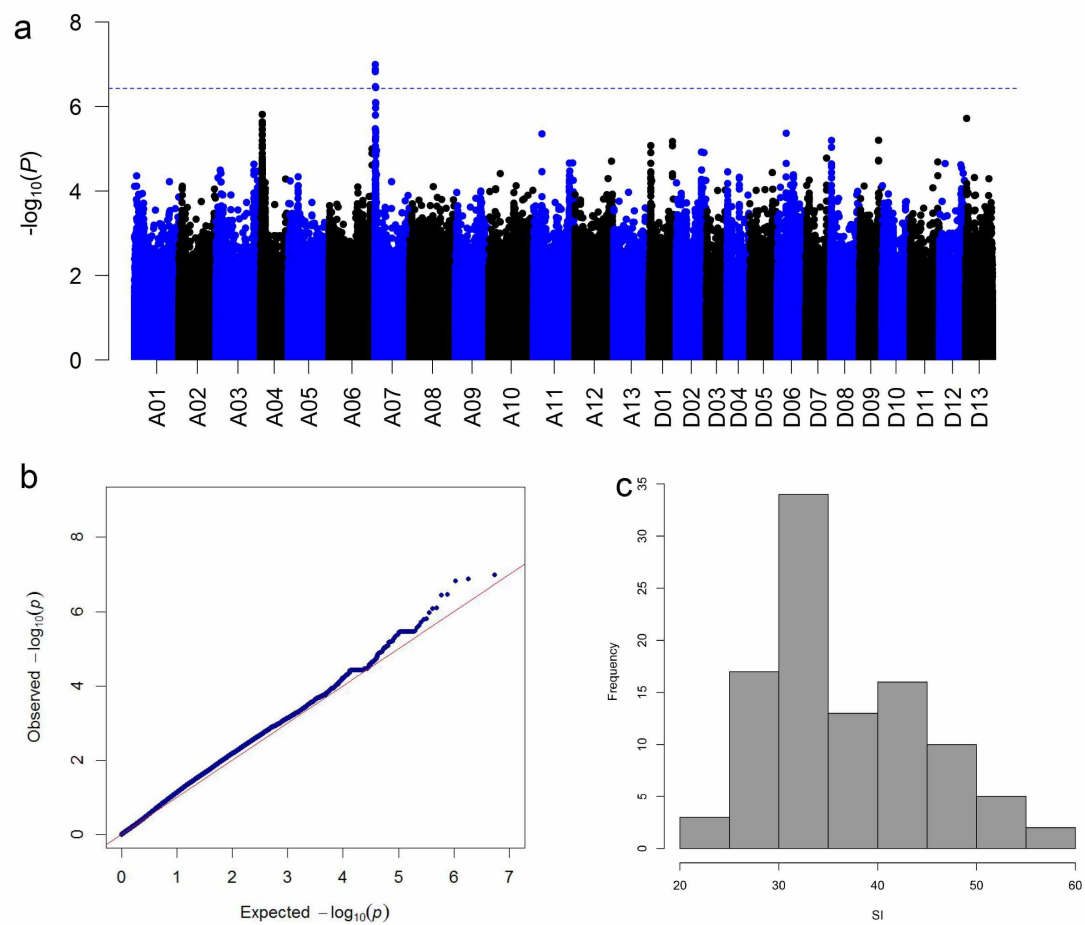

**Figure S6.** GWAS of the shade index (SI) in the XJ15 environment using the MLM (P+Q+K). (a) Manhattan plot of GWAS of SI. (b) Q-Q plot for SI. (c) Histogram of SI in the XJ15 environment.

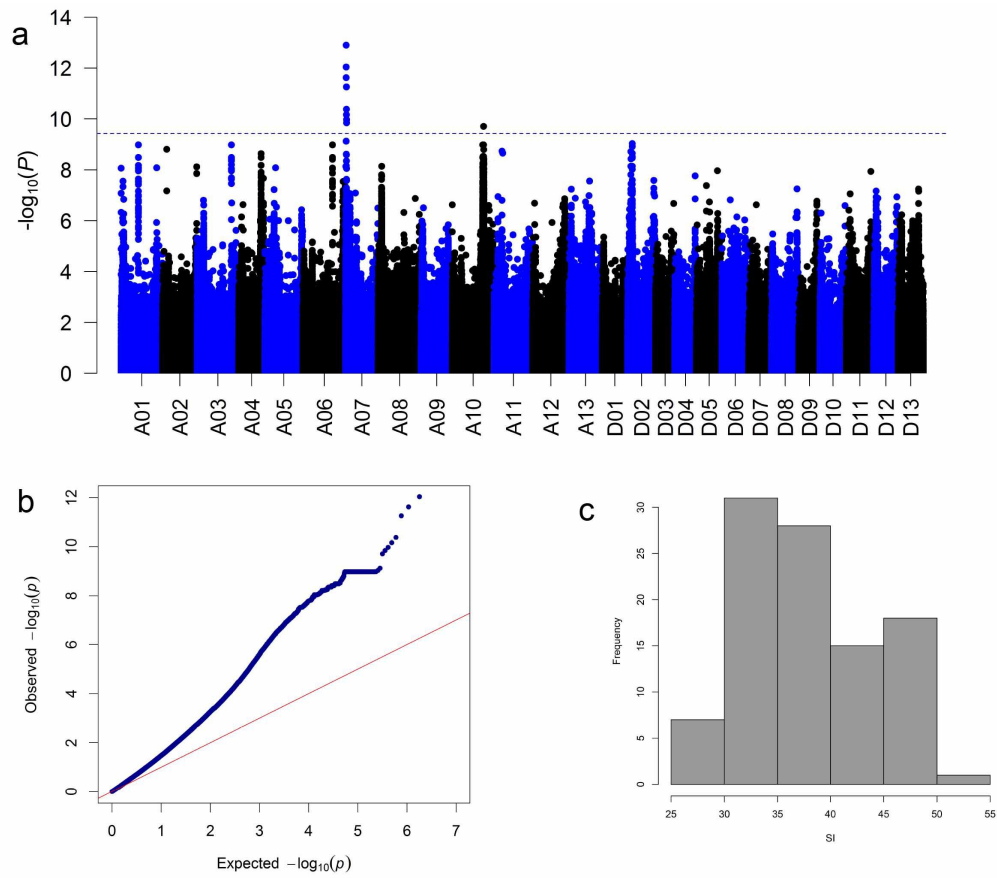

**Figure S7.** GWAS of the shade index (SI) in the BLUP data using the GLM. (a) Manhattan plot of GWAS of SI. (b) Q-Q plot for SI. (c) Histogram of SI of 100 brown fibre accessions in the BLUP data.

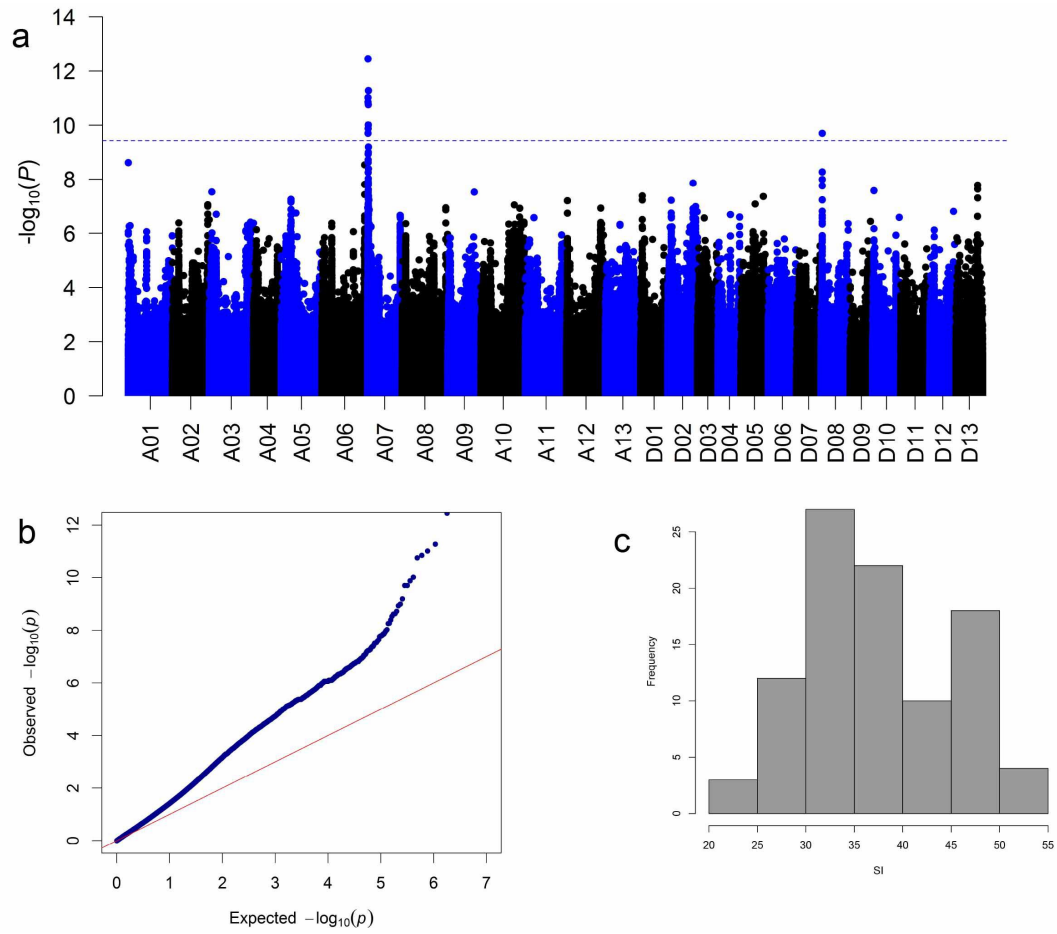

**Figure S8.** GWAS of the shade index (SI) in the HG15 environment using the GLM. (a) Manhattan plot of GWAS of SI. (b) Q-Q plot for SI (c) Histogram of SI of 100 brown fibre accessions in the HG15 environment using the GLM.



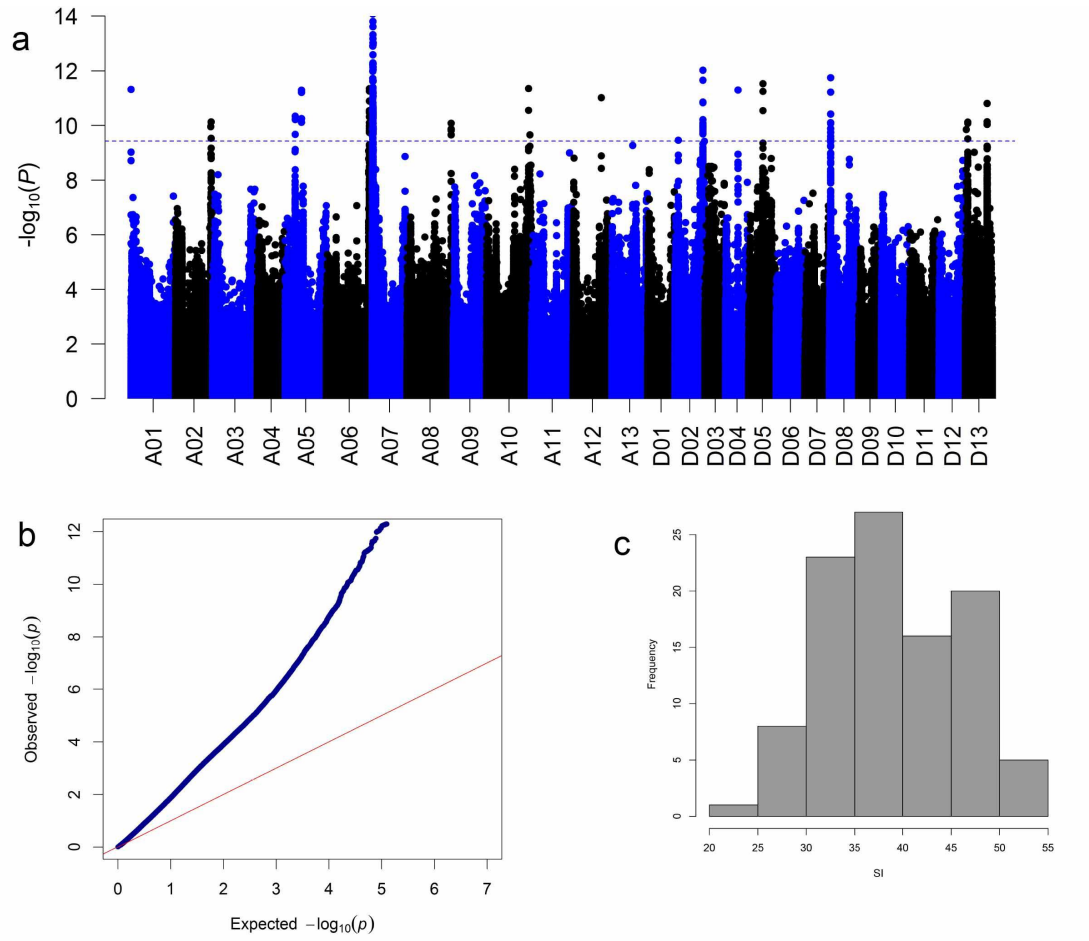

**Figure S9.** GWAS of the shade index (SI) in the XJ16 environment using the GLM. (a) Manhattan plot of GWAS of SI. (b) Q-Q plot for SI. (c) Histogram of SI of 100 brown fibre accessions in the XJ16 environment.

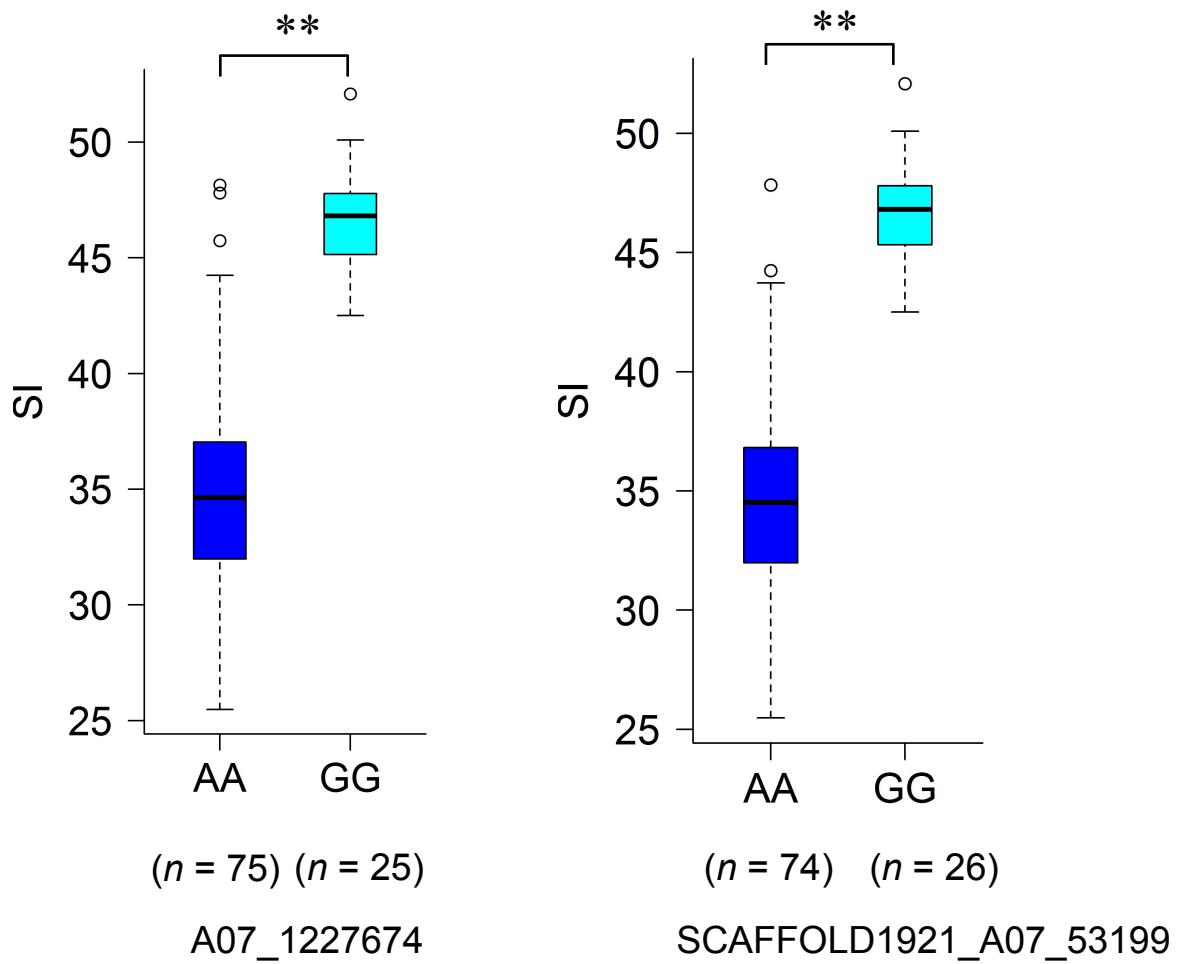

**Figure S10.** Relationship between the significant SNPs and the shade index (SI). (a) Boxplot between the SNP of A07\_1227674 and SI. (b) Boxplot between the SNP of SCAFFOLD1921\_A07\_53199 and SI (\*\* $P < 0.01$ , two tailed t-test).

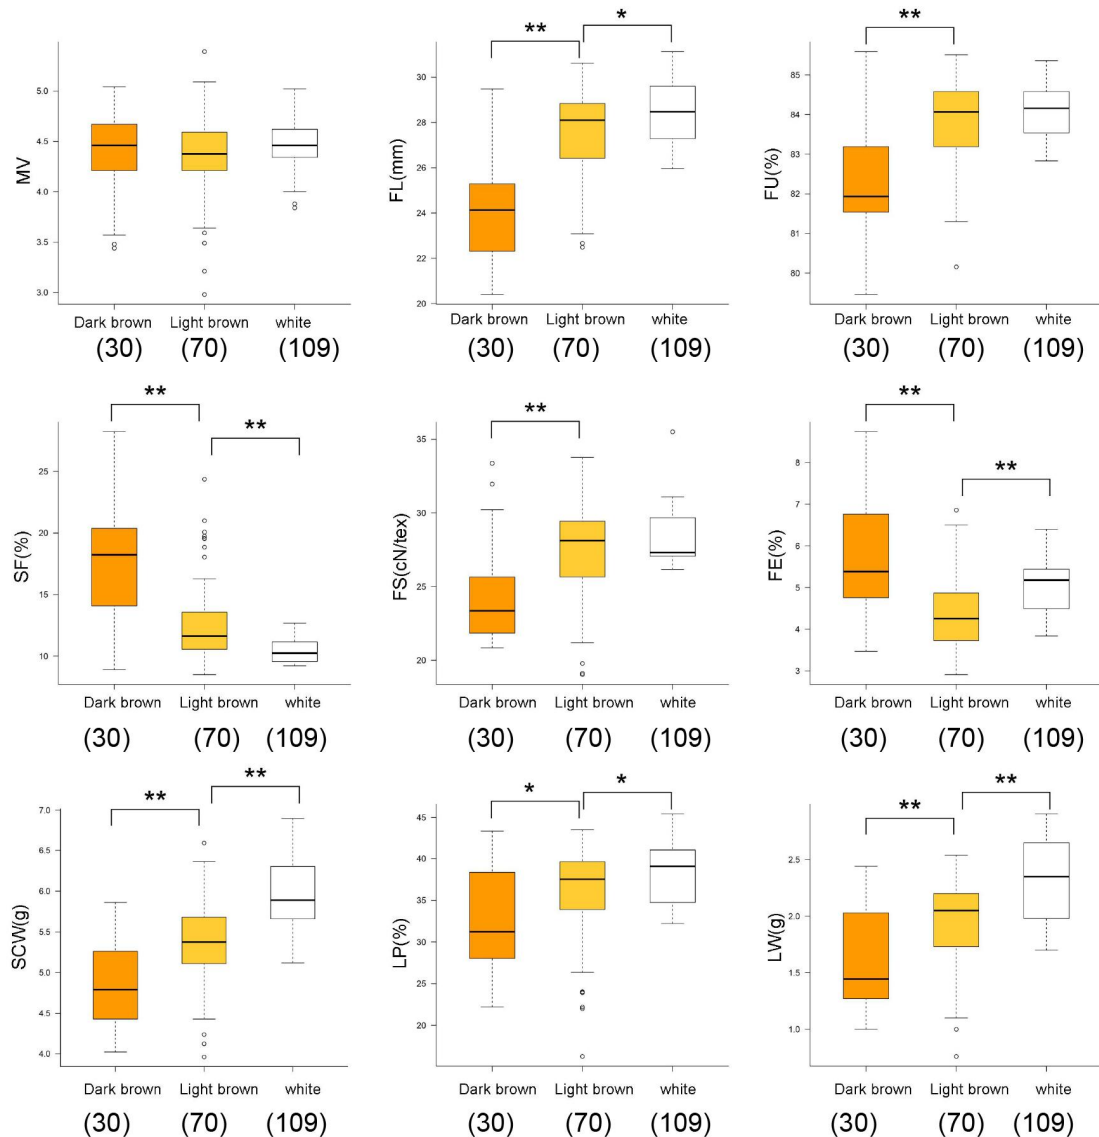

**Figure S11.** Boxplots of the nine agronomic traits among the dark brown fibre group ( $n = 30$ ), light brown fibre group ( $n = 70$ ) and white fibre group ( $n = 109$ ), students t-test was performed to indicate the significant difference ( $*p < 0.05$ ,  $**p < 0.01$ , two tailed t-test) between dark brown and light brown or between the light brown and white. Seed cotton weight, SCW; lint weight, LW; lint percentage, LP; fibre length, FL; fibre elongation, FE; micronaire value, MV; fibre uniformity, FU; short fibre, SF; fibre strength, FS.

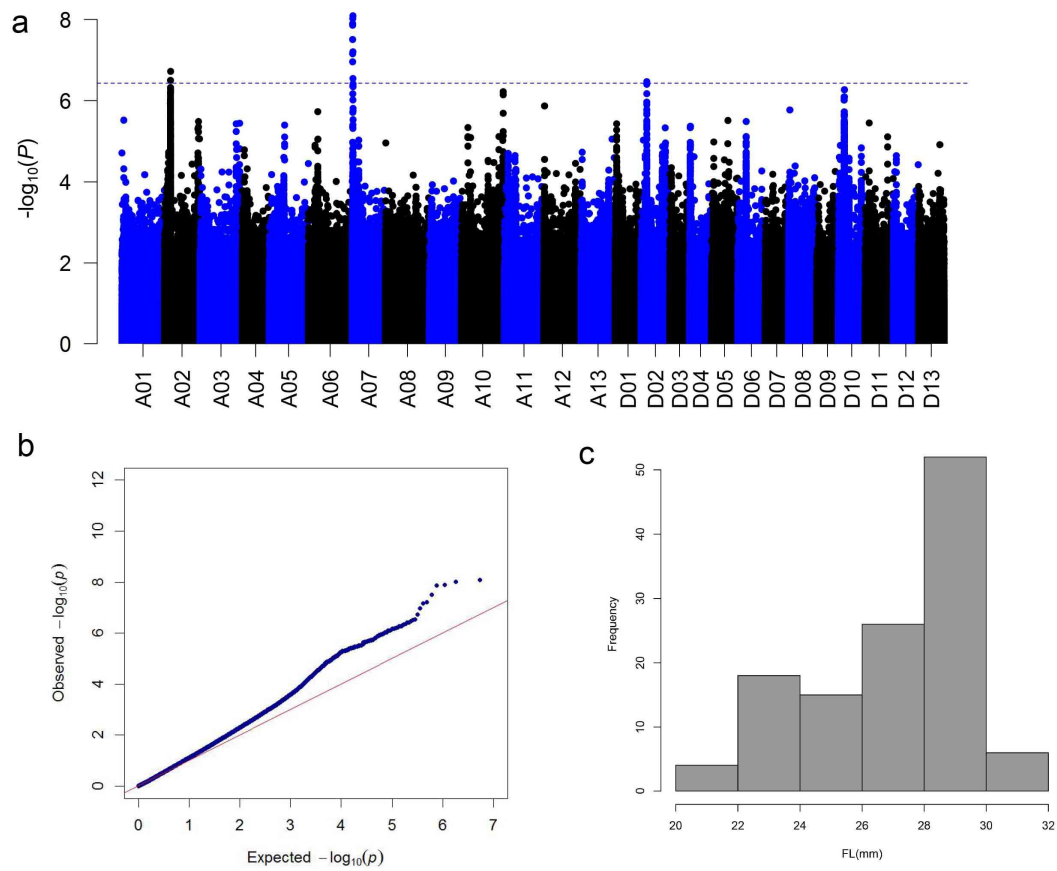

**Figure S12.** GWAS of the fibre length (FL) in the BLUP data using the MLM (P+Q+K). (a) Manhattan plot of GWAS of FL. (b) Q-Q plot for FL. (c) Histogram of FL in the BLUP data.

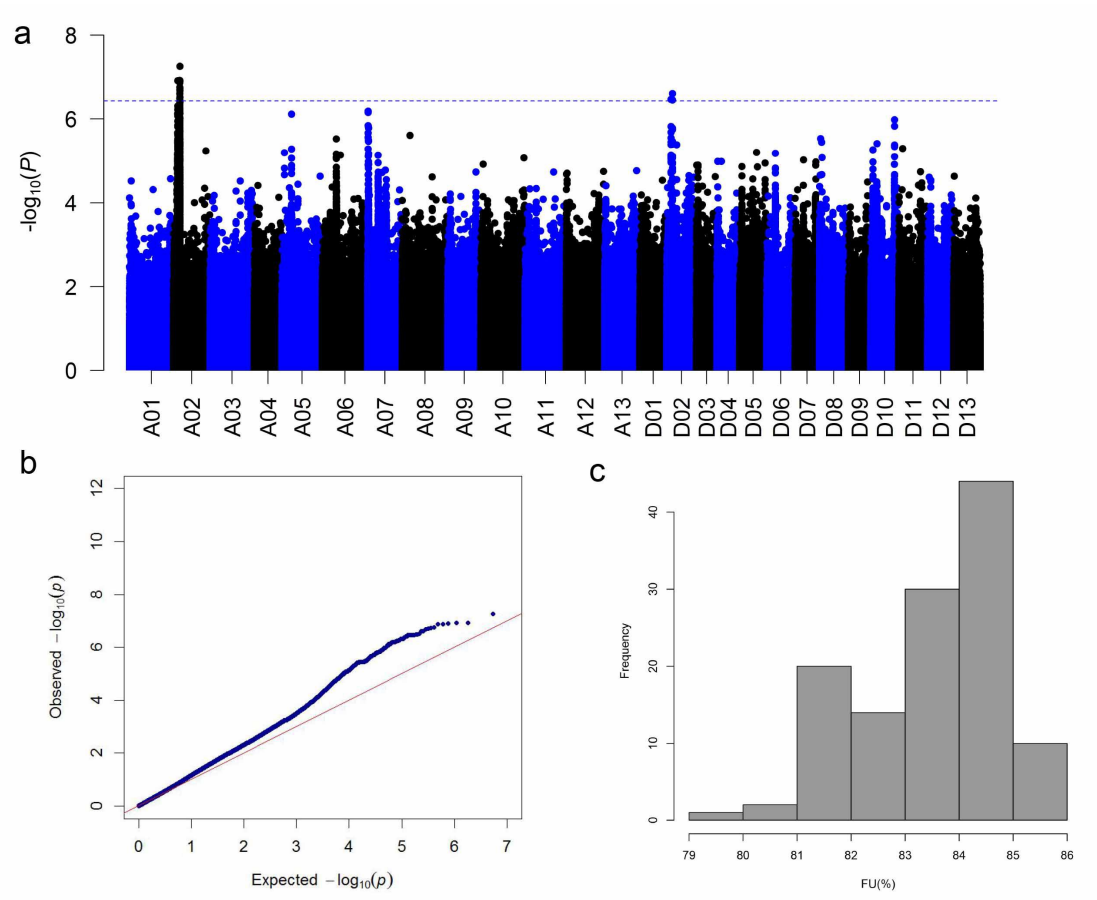

**Figure S13.** GWAS of the fibre unity (FU) in the BLUP data using the MLM (P+Q+K). (a) Manhattan plot of GWAS of FU. (b) Q-Q plot for FU. (c) Histogram of FU in the BLUP data.

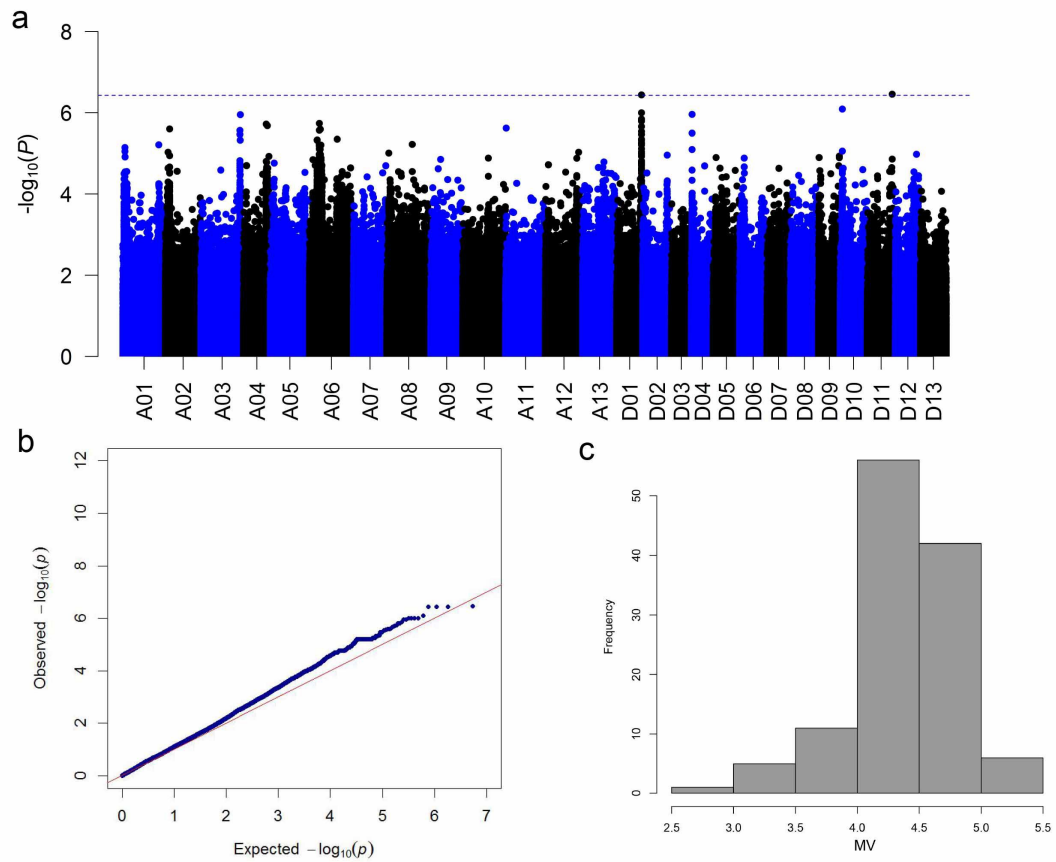

**Figure S14.** GWAS of the micronaire value (MV) in the BLUP data using the MLM (P+Q+K). (a) Manhattan plot of GWAS of MV. (b) Q-Q plot for MV. (c) Histogram of MV in the BLUP data.

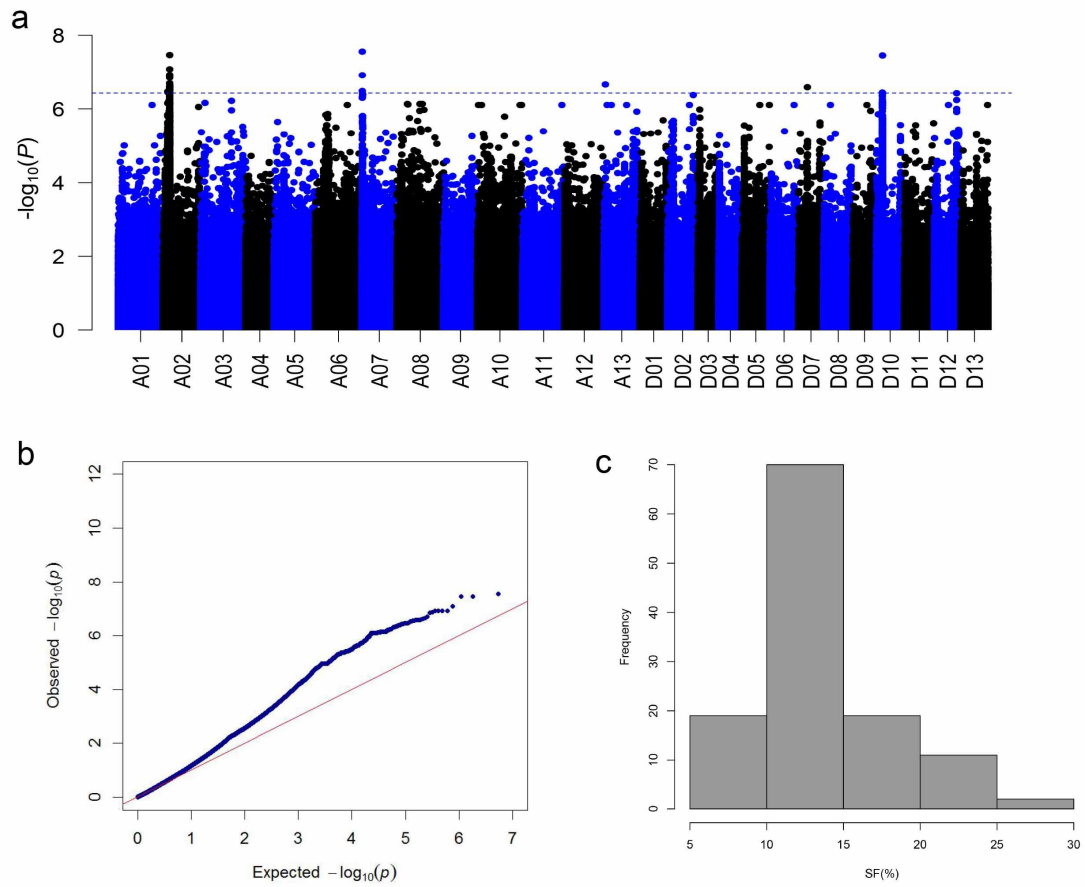

**Figure S15.** GWAS of the short fibre percentage (SF) in the BLUP data using the MLM (P+Q+K). (a) Manhattan plot of GWAS of SF. (b) Q-Q plot for SF. (c) Histogram of SF in the BLUP data.

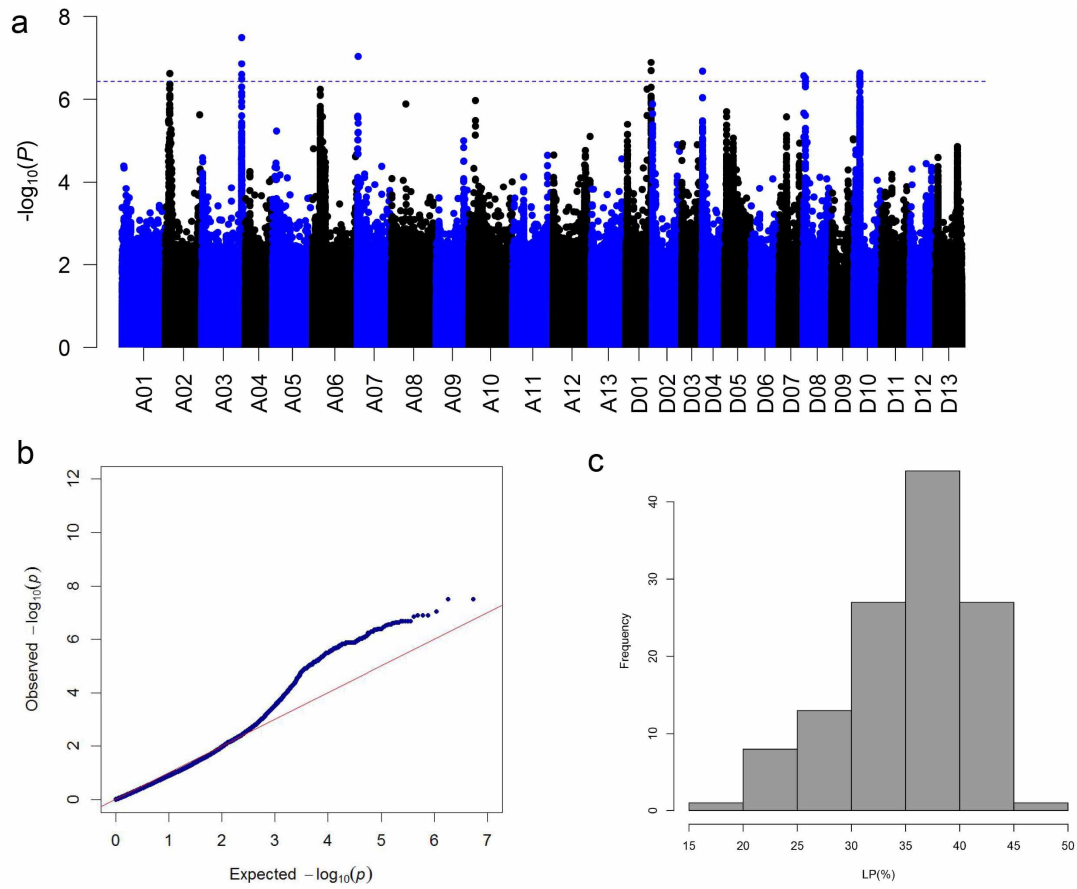

**Figure S16.** GWAS of the lint percentage (LP) in the BLUP data using the MLM (P+Q+K). (a) Manhattan plot of GWAS of LP. (b) Q-Q plot for LP. (c) Histogram of LP in the BLUP data.



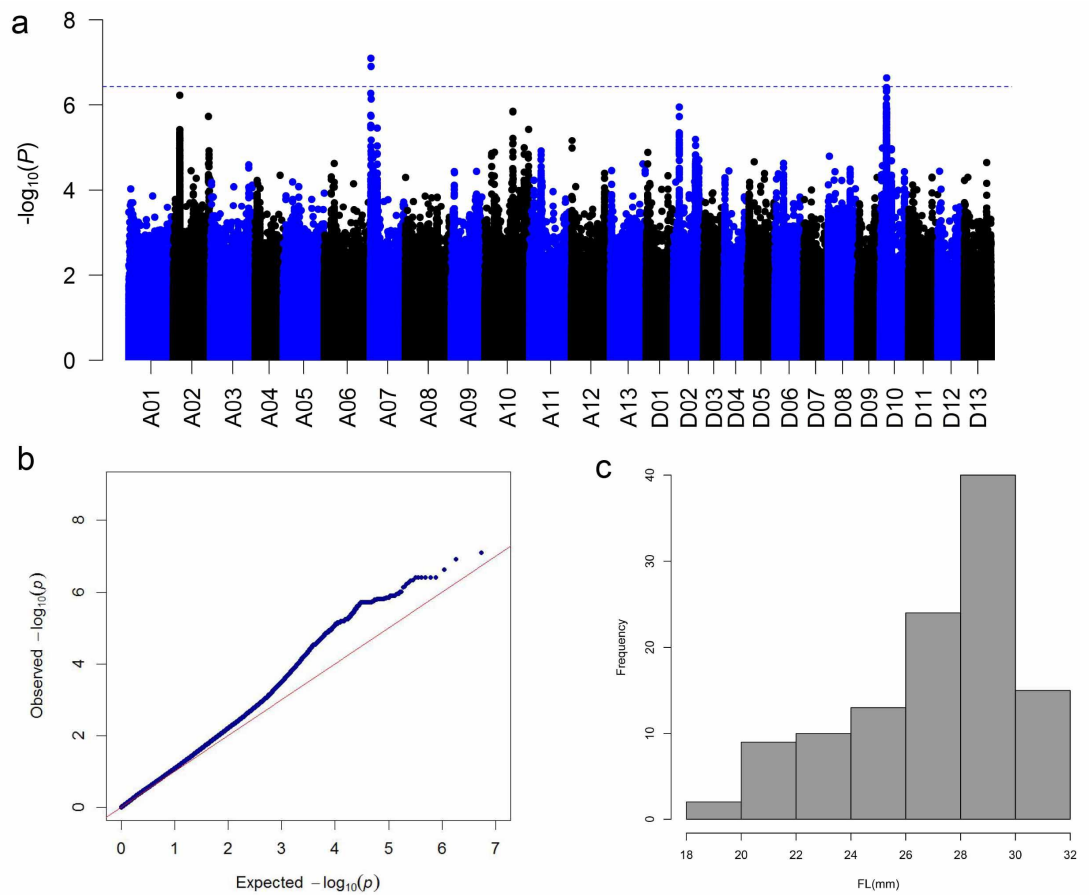

**Figure S17.** GWAS of the fibre length (FL) in the HG15 environment using the MLM (P+Q+K). (a) Manhattan plot of GWAS of FL. (b) Q-Q plot for FL. (c) Histogram of FL in the HG15 environment.

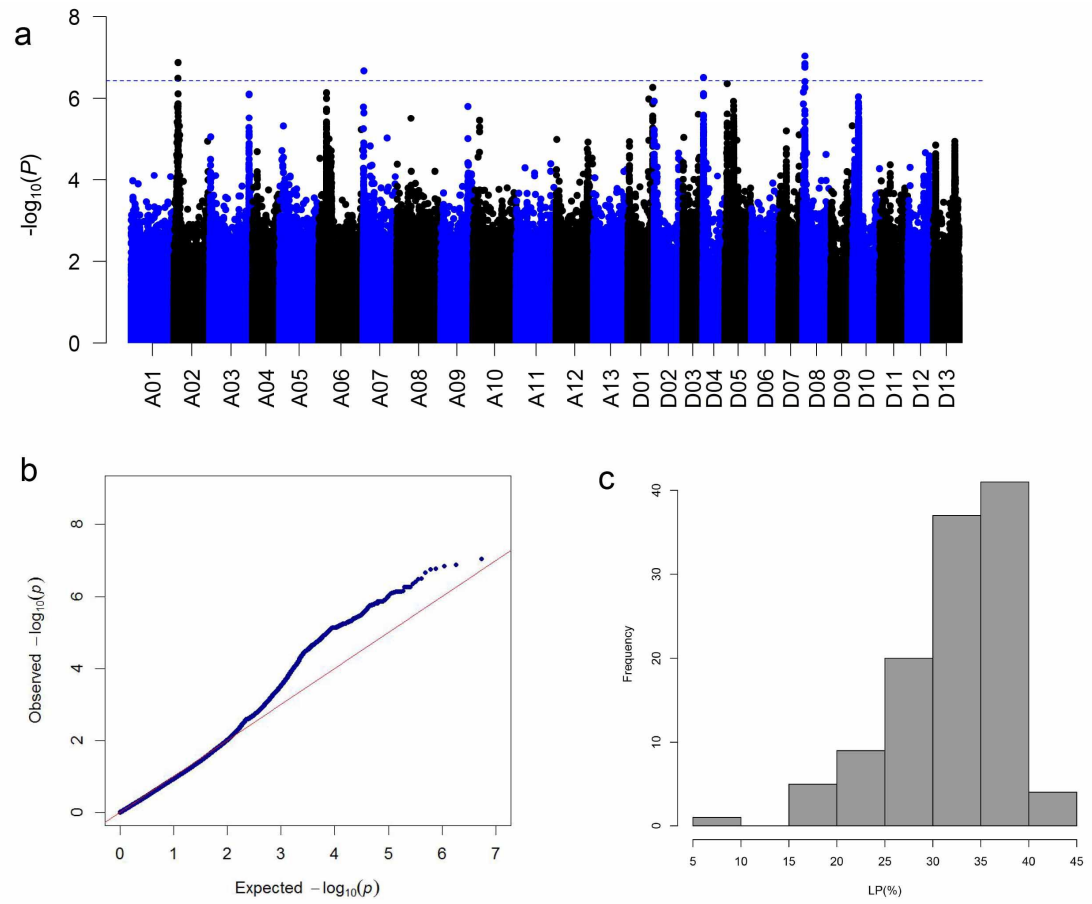

**Figure S18.** GWAS of the lint percentage (LP) in the HG15 environment using the MLM (P+Q+K). (a) Manhattan plot of GWAS of LP. (b) Q-Q plot for LP. (c) Histogram of LP in the HG15 environment.

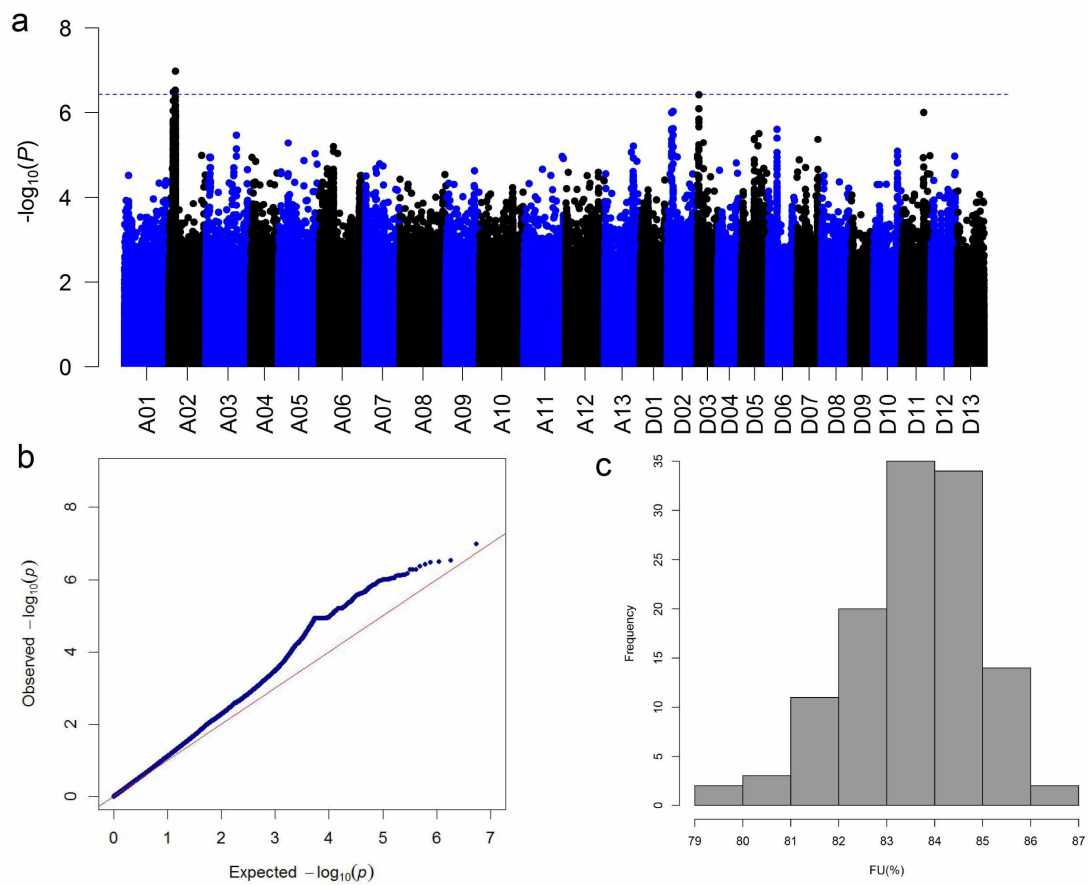

**Figure S19.** GWAS of the fibre unity (FU) in the XJ15 environment using the MLM (P+Q+K). (a) Manhattan plot of GWAS of FU. (b) Q-Q plot for FU. (c) Histogram of FU in the XJ15 environment.

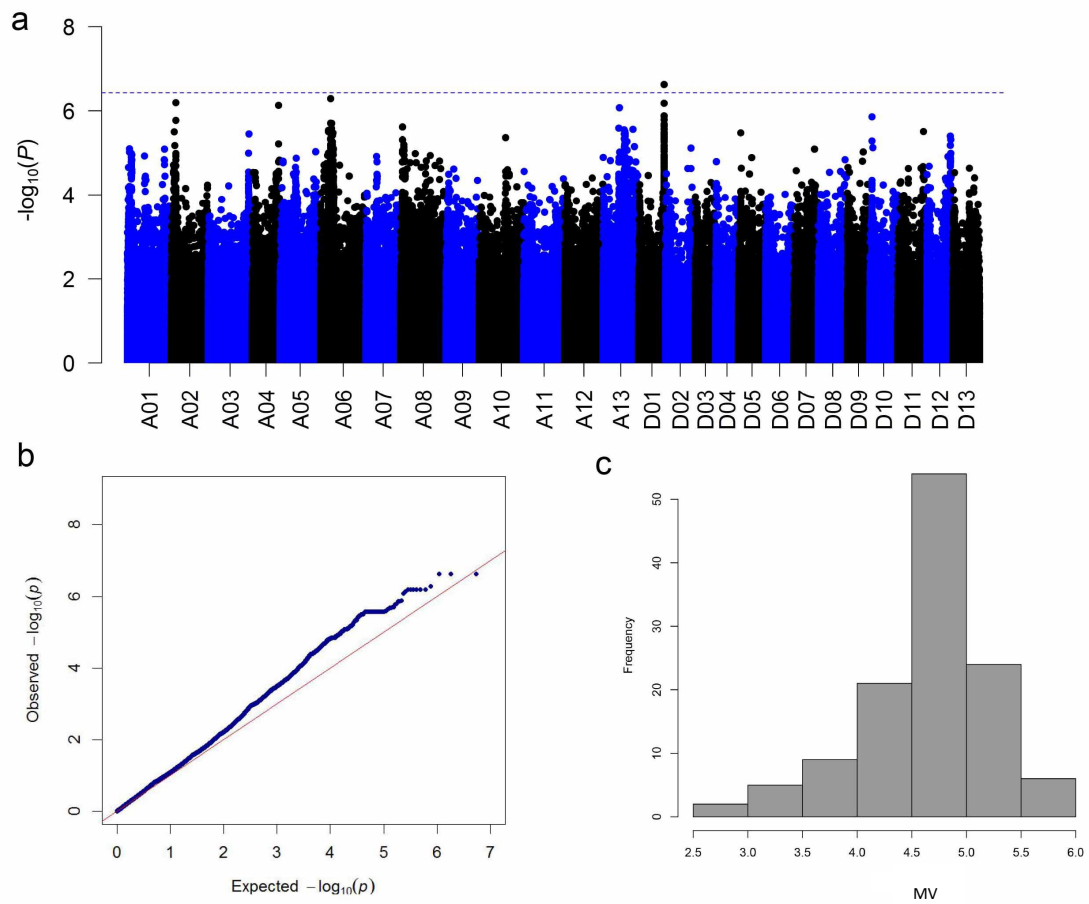

**Figure S20.** GWAS of the micronaire value (MV) in the XJ15 environment using the MLM (P+Q+K). (a) Manhattan plot of GWAS of MV. (b) Q-Q plot for MV. (c) Histogram of MV in the XJ15 environment.

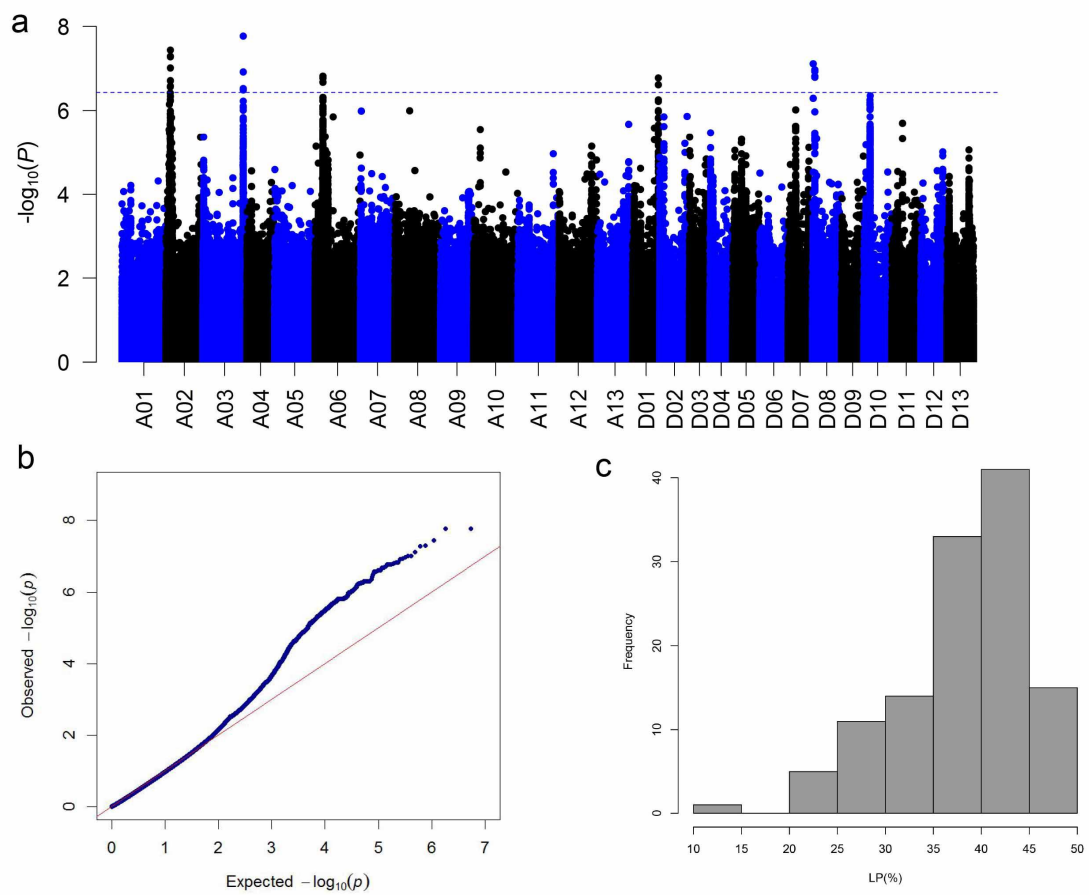

**Figure S21.** GWAS of the lint percentage (LP) in the XJ15 environment using the MLM (P+Q+K). (a) Manhattan plot of GWAS of LP. (b) Q-Q plot for LP. (c) Histogram of LP in the XJ15 environment.

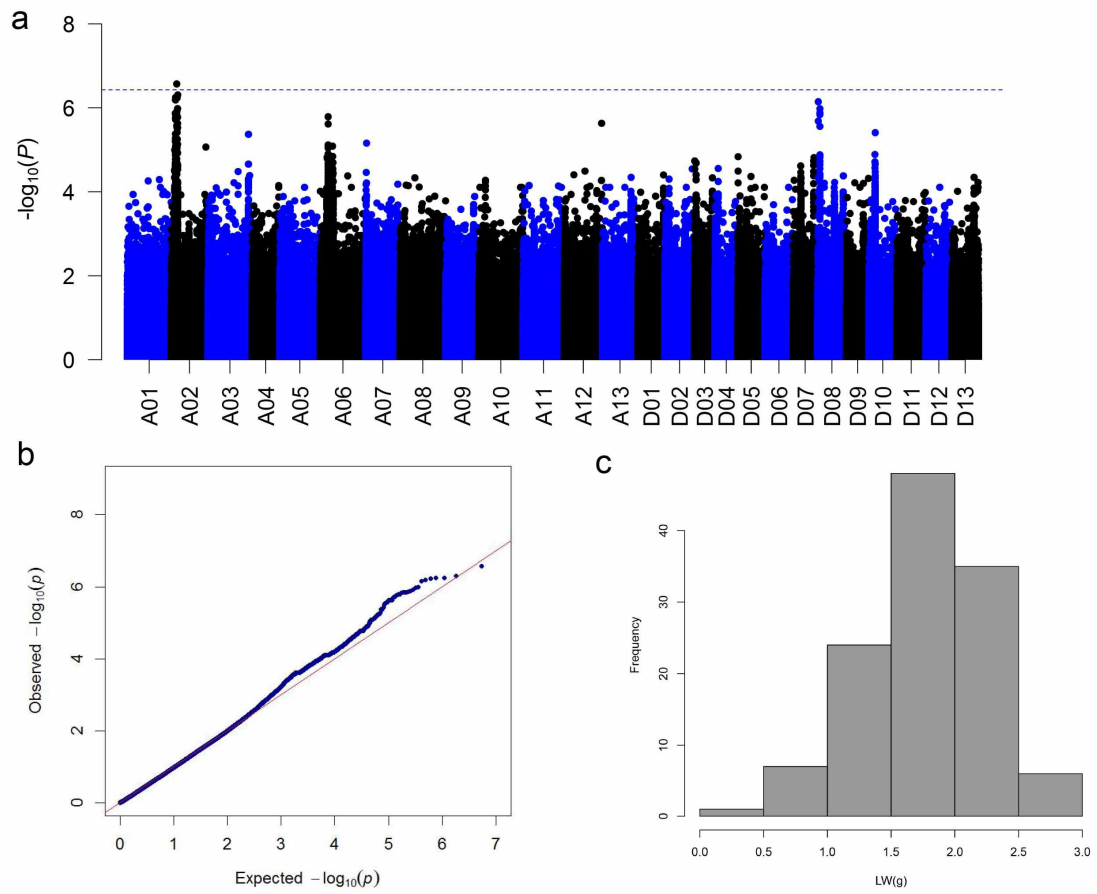

**Figure S22.** GWAS of the lint weight (LW) in the XJ15 environment using the MLM (P+Q+K). (a) Manhattan plot of GWAS of LW. (b) Q-Q plot for LW. (c) Histogram of LW in the XJ15 environment.

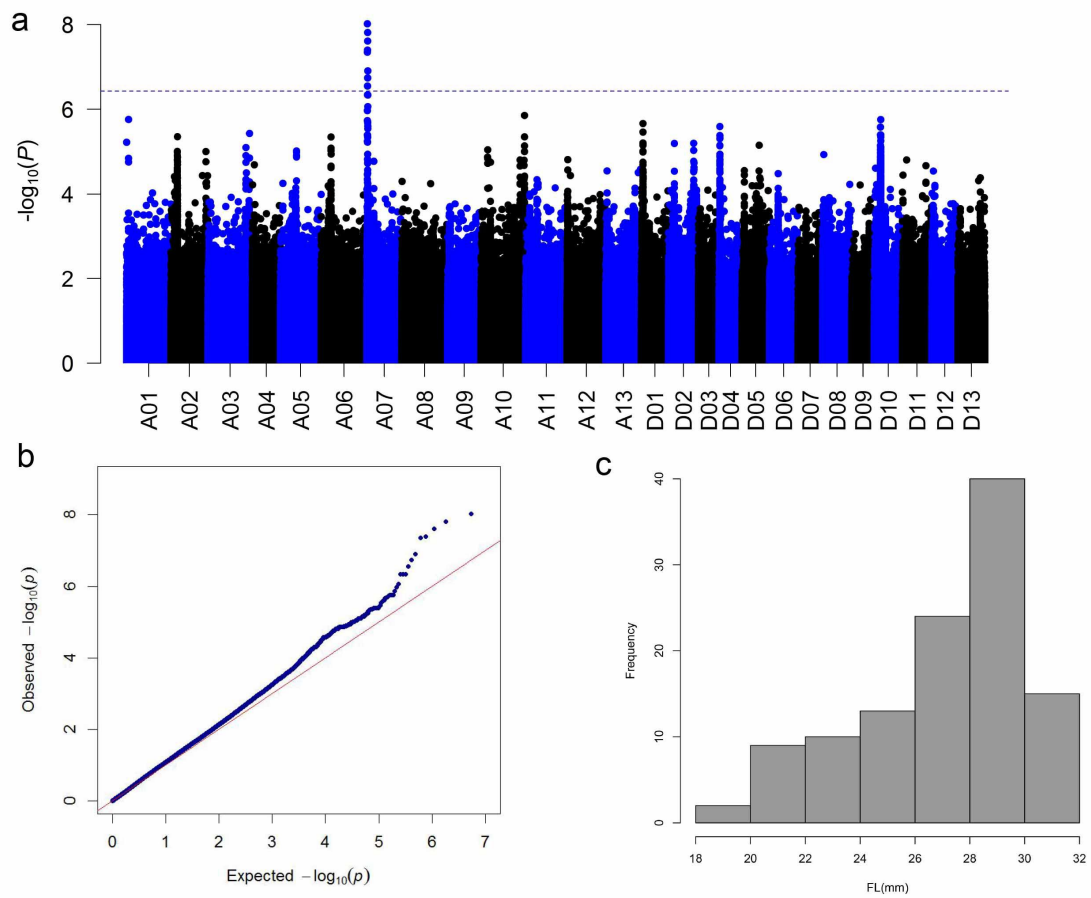

**Figure S23.** GWAS of the fibre length (FL) in the XJ16 environment using the MLM (P+Q+K). (a) Manhattan plot of GWAS of FL. (b) Q-Q plot for FL. (c) Histogram of FL in the XJ16 environment.

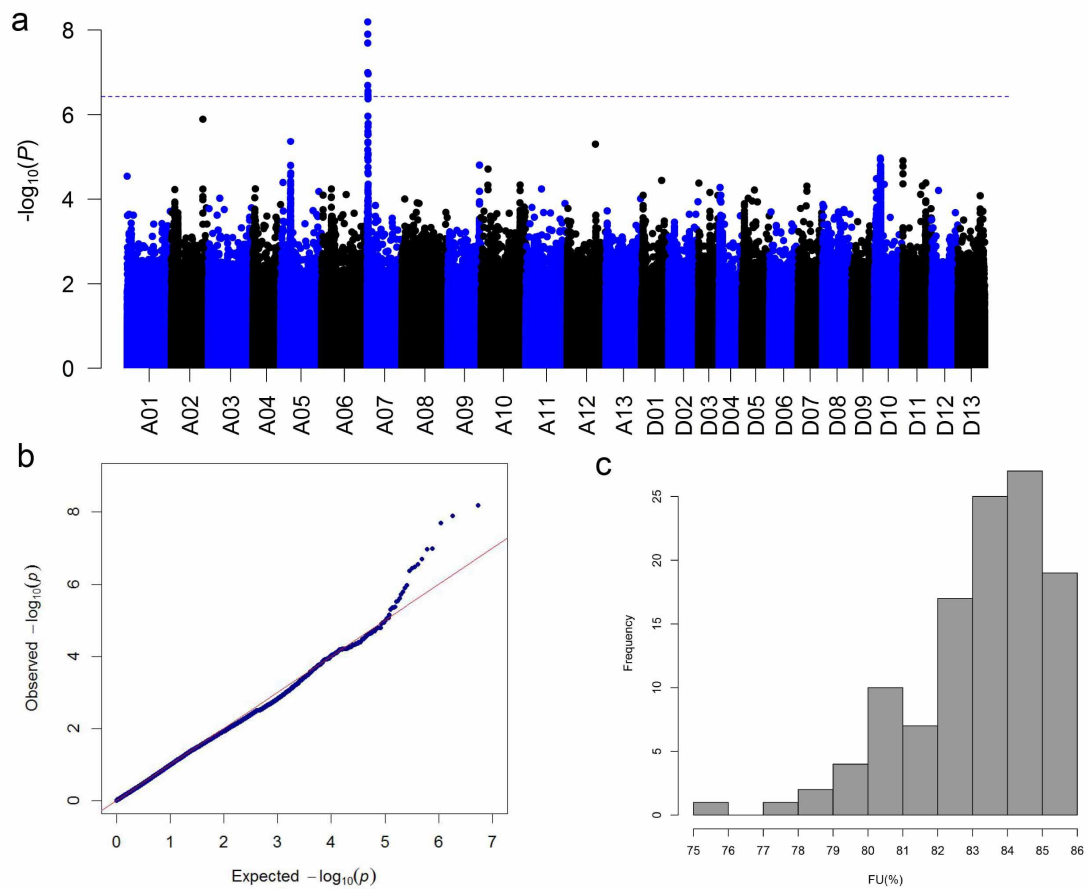

**Figure S24.** GWAS of the fibre unity (FU) in the XJ16 environment using the MLM (P+Q+K). (a) Manhattan plot of GWAS of FU. (b) Q-Q plot for FU. (c) Histogram of FU in the XJ16 environment.



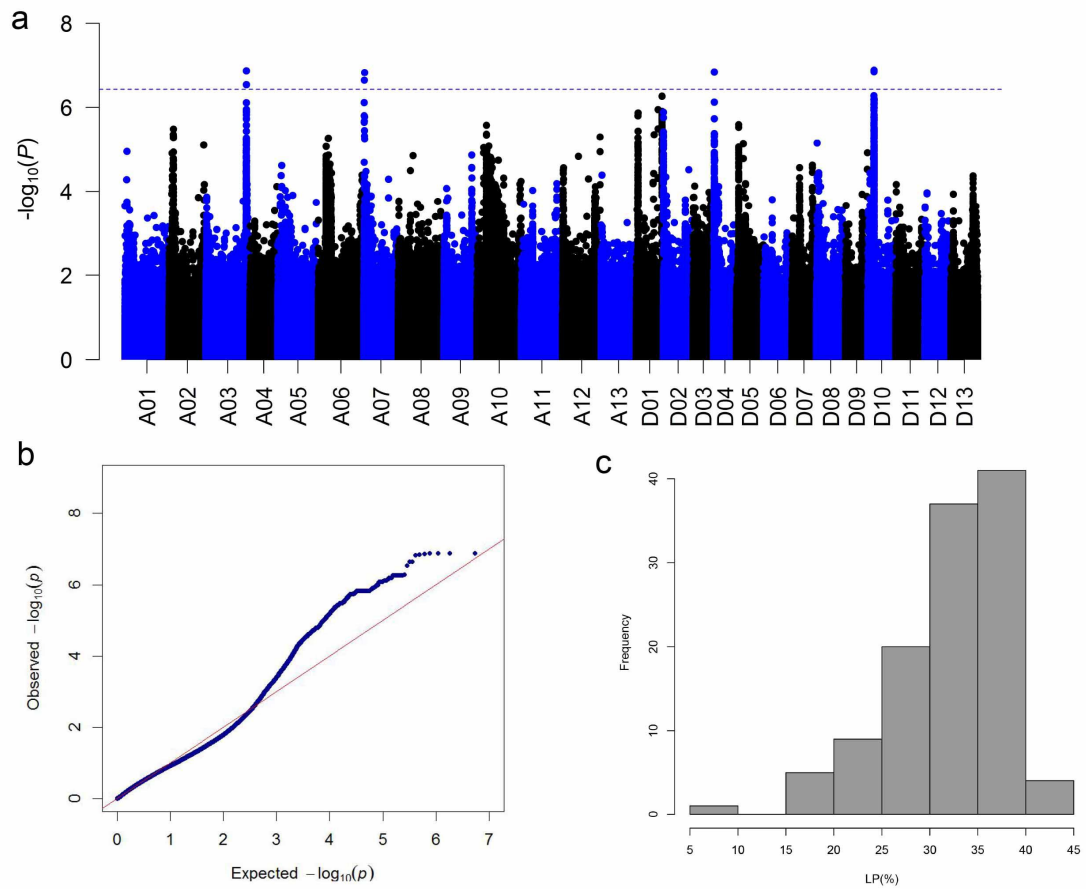

**Figure S25.** GWAS of the lint percentage (LP) in the XJ16 environment using the MLM (P+Q+K). (a) Manhattan plot of GWAS of LP. (b) Q-Q plot for LP. (c) Histogram of LP in the XJ16 environment.

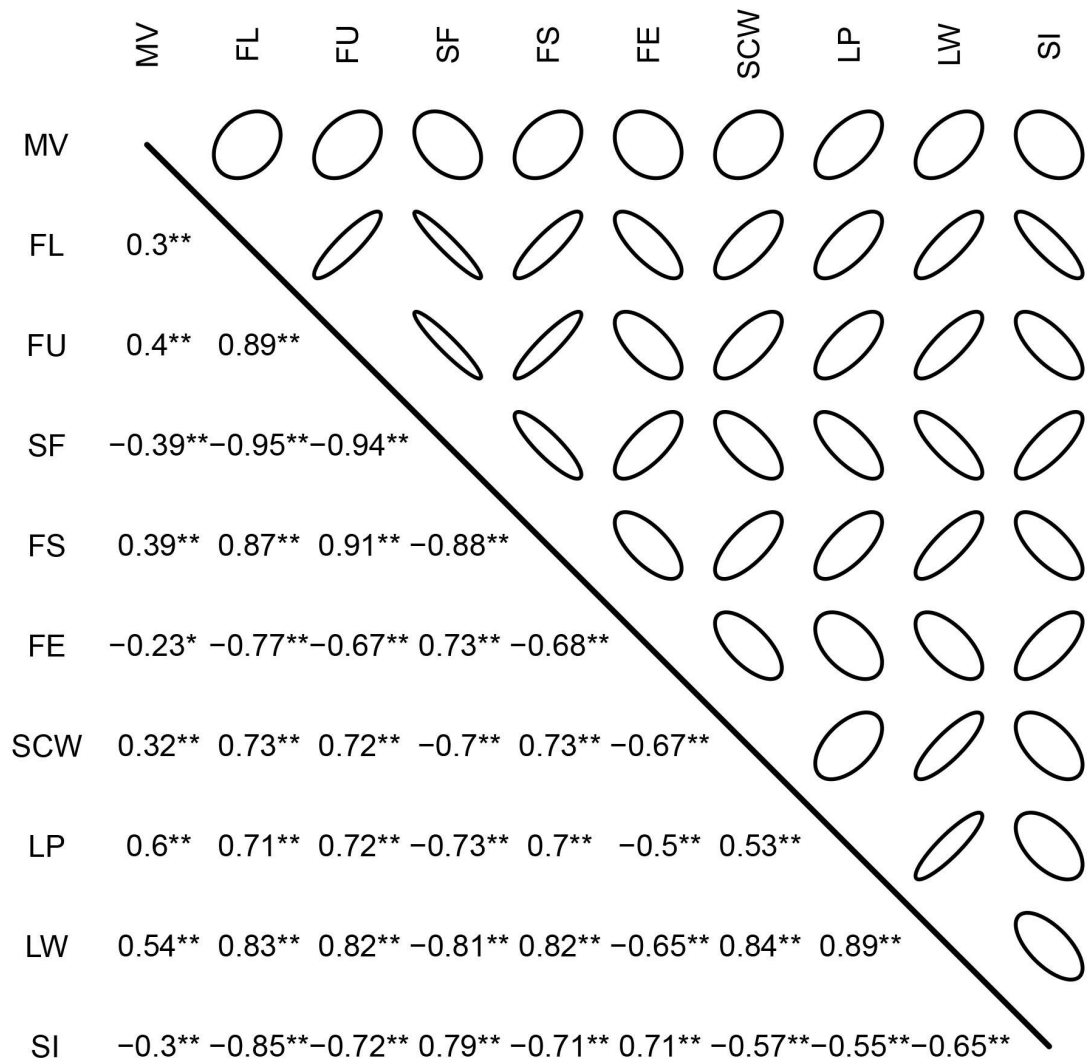

**Figure S26.** Correlation matrix between the shade index (SI) and nine agronomic traits in 100 brown fibre accessions. Micronaire value, MV; fibre length, FL; fibre uniformity, FU; short fibre, SF; fibre strength, FS; fibre elongation, FE; seed cotton weight, SCW; lint percentage, LP; lint weight, LW; shade index, SI. \* and \*\* indicate the significant at  $P < 0.05$  and  $P < 0.01$ , respectively. The shape and direction of the circles reflect the correlation between the SI and nine agronomic traits.
